# Supplementary material for: Acetylcholinesterase-functionalized two-dimensional photonic crystals for the detection of organophosphates
Source: Royal Society of Chemistry journal article supplement (doi:10.1039/c8ra04953j), 2018-01-01
Supplement: c8ra04953j1.pdf [file c8ra04953j1.pdf]

### 1. The construction of standard curve for the detection of enzyme activity.

Experiment: 0.15 mol L<sup>-1</sup> Tris buffer (pH 8.0) was used to prepare 1.8 × 10<sup>-4</sup> mol L<sup>-1</sup> DTNB solution. Then 0.025, 0.050, 0.075, 0.100 and 0.125 mmol L<sup>-1</sup> L-cysteine hydrochloride was respectively dissolved in the DTNB solution. After that, the AChE-functionalized 2D-PC was respectively placed into a series of L-cysteine hydrochloride solutions and UV absorbance at 412 nm was monitored.

Table S1 Data of Standard Curve

| Concentration of L-cysteine hydrochloride (mmol.L <sup>-1</sup> ) | Absorbance 1 | Absorbance 2 | Absorbance 3 | Absorbance average |
|-------------------------------------------------------------------|--------------|--------------|--------------|--------------------|
| 0.025                                                             | 0.32253      | 0.3224       | 0.3225       | 0.322477           |
| 0.050                                                             | 0.65044      | 0.65027      | 0.65001      | 0.65024            |
| 0.075                                                             | 0.972        | 0.97182      | 0.97154      | 0.971787           |
| 0.100                                                             | 1.26311      | 1.26312      | 1.26234      | 1.262857           |
| 0.125                                                             | 1.59422      | 1.59169      | 1.59354      | 1.59315            |
| 0.150                                                             | 1.89241      | 1.89133      | 1.89098      | 1.891573           |
| 0.175                                                             | 2.21499      | 2.21065      | 2.21872      | 2.214787           |

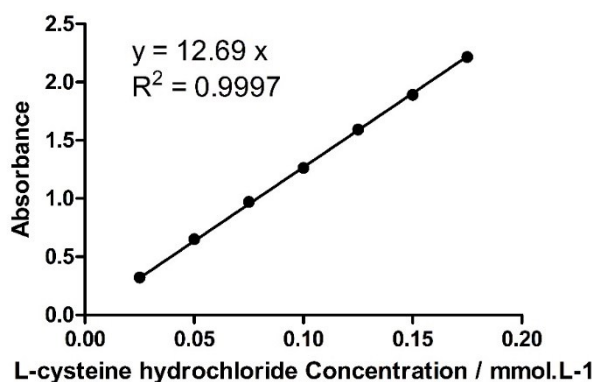

Figure S1 Standard Curve of L-cysteine hydrochloride

### 2. Measurement of binding amounts of AChE

#### 2.1. Standard curve

Experiment: 2 mL obtained G-250 solution was mixed with 50  $\mu$  L AChE solution varied from 0.5 to 3.0 mg/mL (adjusted with 0.15 mol L<sup>-1</sup> Tris-HCl buffer, pH=7.4) and UV absorbance at 595 nm was measured.

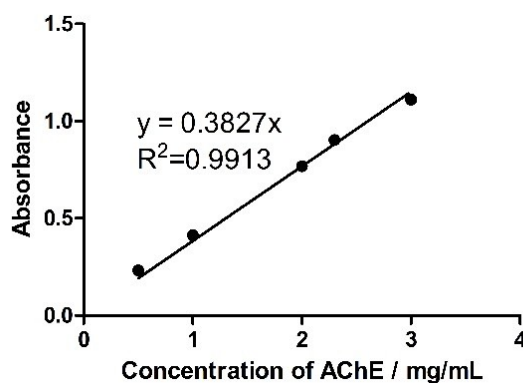

Figure S2 Standard Curve of AChE solution

## 2.2. Detection of AChE-functionalized 2D-PC

The amount of AChE on film ( $\text{mg cm}^{-2}$ ) meets following equation:

$$m = 4(A_0 - A_1)/(0.25 \times 12K) \quad (S1)$$

where  $A_0$  and  $A_1$  are AChE solution before and after modification respectively, K is the slope of standard curve, 4 is the volume of AChE solution, 0.25 is the area of every film, 12 represents the amount of films.

The change of absorbance ( $A_0 - A_1$ ) and the amounts of AChE on film were depicted in table S2.

Table S2 data of AChE-functionalized 2D-PC

|                                                     | sample 1 | sample 2 | sample 3 | sample average |
|-----------------------------------------------------|----------|----------|----------|----------------|
| Change of absorbance                                | 0.1046   | 0.1517   | 0.1131   | 0.1231         |
| The amounts of AChE on film ( $\text{mg cm}^{-2}$ ) | 0.36     | 0.53     | 0.39     | <b>0.43</b>    |

## 3. water-solubility of organophosphates

Table S3 Water-solubility of some organophosphates <sup>a</sup>.

| organophosphates | dipterex | dichlorvos | malathion                                      | methidathion                                   | acephate | glufosinate-ammonium |
|------------------|----------|------------|------------------------------------------------|------------------------------------------------|----------|----------------------|
| water-solubility | soluble  | soluble    | $4.39 \times 10^{-4}$ mol/L (slightly soluble) | $7.94 \times 10^{-4}$ mol/L (slightly soluble) | soluble  | soluble              |

<sup>a</sup> Data sources: <https://www.baidu.com/>

#### 4. Calculations of limit of detection (LOD)

We surmised that there was a linear correlation between particle spacing of our sensor and dipterex concentration at the range of 0~ $10^{-14}$  mol L<sup>-1</sup> before calculations. We measured the responsivity of our AChE-PC sensor to a 50 mL of dipterex at a concentration of  $10^{-14}$  mol L<sup>-1</sup> and a 38 nm decrease in particle spacing was observed. The resulting responsivity was calculated as  $S=38 \times 10^{14}$  nm/(mol L<sup>-1</sup>). At the blank solution, the average standard deviation is  $\sigma=8.9$  nm. As a consequence, the  $LOD=3.3 \times \sigma/S=7.7 \times 10^{-15}$  mol L<sup>-1</sup>.

#### 5. Performance comparison of different materials

Table S4 Comparison of various analytical methods for sensing Sarin analogs

| Method Names              | Analyte  | Strengths/<br>Weakness                                                                                                                                                                     | Sensitivity                                     | References |
|---------------------------|----------|--------------------------------------------------------------------------------------------------------------------------------------------------------------------------------------------|-------------------------------------------------|------------|
| AChE-functionalized 2D-PC | Dipterex | <b>S:</b> detecting organophosphate with high sensitivity; miniaturized; simple detection device; simple preparation;<br><b>W:</b> can't detect dipterex in complex environment until now. | LOD: $0.77 \times 10^{-14}$ mol L <sup>-1</sup> | This study |
| 3D-PC biosensor           | Sarin    | <b>S:</b> detecting a real chemical warfare with high sensitivity;                                                                                                                         | LOD: $10^{-15}$ mol L <sup>-1</sup>             | [1]        |

|                       |                                                 |                                                                                                                                                                                                            |                                                                                   |
|-----------------------|-------------------------------------------------|------------------------------------------------------------------------------------------------------------------------------------------------------------------------------------------------------------|-----------------------------------------------------------------------------------|
|                       |                                                 | W: can't detect Sarin in complex environment until now.                                                                                                                                                    |                                                                                   |
| SERS                  | VX;<br>tabun                                    | S: high sensitivity; using a portable device;<br>W: relatively high cost; require extensive sample pre-treatment;                                                                                          | LOD: ~13 fmol (VX); ~670 fmol (tabun) [2]                                         |
| SERS                  | DMMP<br>; PMP;<br>DEPA;<br>CEES                 | S: enormous electro-magnetic enhancement;<br>W: relatively high cost; require extensive sample pre-treatment;                                                                                              | LOD: lower than 1 ppm; [3]                                                        |
| SERS                  | VX and<br>its<br>hydroly<br>sis<br>product<br>s | S: could distinguish the nerve agent VX and its hydrolysis products;<br>W: relatively high cost; require extensive sample pre-treatment;                                                                   | 50-100ug L <sup>-1</sup> [4]                                                      |
| CIEE/FS               | DCP                                             | S: high sensitivity; large emission shift;<br>W: time-consuming; require extensive sample pre-treatment; relying on sophisticated instruments                                                              | LOD: 17 nmol L <sup>-1</sup> [5]                                                  |
| HPLC-<br>MS/CE-<br>UV | DMT;<br>DET;<br>DPT;<br>DIT                     | S: sufficient separation of these four compounds in environmental forensic analysis of samples with minimum sample pre-treatment;<br>W: time-consuming; require extensive sample pre-treatment; relying on | LOD: 0.015-0.025mg L <sup>-1</sup> (HPLC-MS); 1.5-2mg L <sup>-1</sup> (CE-UV) [6] |

|           |                         |                                                                                                        |                                   |
|-----------|-------------------------|--------------------------------------------------------------------------------------------------------|-----------------------------------|
|           |                         | sophisticated instruments                                                                              |                                   |
|           |                         | <b>S:</b> could detect real samples; good alternative extraction method;                               | LOD: 0.2 ng L <sup>-1</sup>       |
| SPME/GC   | TnBP;                   | <b>W:</b> time-consuming;                                                                              | (TnBP); 1.5ng L <sup>-1</sup> [7] |
| -MS       | TEHP                    | require extensive sample pre-treatment; relying on sophisticated instruments                           | <sup>1</sup> (TEHP)               |
|           |                         | <b>S:</b> realized qualitative and quantitative determination of pesticide residues in mangoes;        | LOD: 1.0-3.3 [8]                  |
| SPME/GC   | 14 pesticide residue    | <b>W:</b> time-consuming;                                                                              | $\mu\text{g kg}^{-1}$             |
| -MS       | s                       | require extensive sample pre-treatment; relying on sophisticated instruments                           |                                   |
|           |                         | <b>S:</b> gas detection; short detection time (2.8s)                                                   |                                   |
| IMS/DMS   | Tabun, Sarin, Soman, VX | <b>W:</b> time-consuming; require extensive sample pre-treatment; relying on sophisticated instruments | LOD: 20 $\mu\text{g m}^{-3}$ [9]  |
|           |                         | <b>S:</b> could detect sample in a variety of sample matrixes (water, kerosene, gasoline, diesel);     | LOD: lower than [10]              |
| IM(tof)MS | DMMP                    | <b>W:</b> time-consuming; require extensive sample pre-treatment; relying on sophisticated instruments | 1000 ppm;                         |

---

**Abbreviation:** surface-enhanced Raman scattering (SERS); dimethyl methylphosphate (DMMP); pinacolyl methylphosphonate (PMP); diethyl phosphoramidate (DEPA); chloroethyl ethylsulfide (CEES); cyclization-induced emission enhancement (CIEE); fluorescence spectrum (FS); diethyl chlorophosphate (DCP); high-performance liquid

chromatography-mass spectrometry (HPLC-MS); capillary electrophoresis with direct ultraviolet detection (CE-UV); N, N-(dialkyl)aminoethanesulfonicacids, where alkyl = methyl, ethyl, n-propyl or iso-propyl (DMT, DET, DPT, and DIT, re-spectively); solid-phase microextraction (SPME); gas chromatography–mass spectrometry (GC–MS); tri-n-butyl phosphate (TnBP); tris (2-ethylhexyl) phosphate (TEHP); ion mobility spectrometry (IMS); differential mobility spectrometry (DMS); ion mobility orthogonal reflector time-of-flight mass spectrometer (IM-(tof)MS);

#### **References:**

- [1] C. X. Yan, F. L. Qi, S. G. Li, J. Y. Xu, C. Liu, Z. H. Meng, L. L. Qiu, M. Xue, W. Lu and Z. Q. Yan, *Talanta*, 2016, 159, 412-417.
- [2] A. Hakonen, T. Rindzevicius, M.S. Schmidt, P.O. Andersson, L. Juhlin, M. Svedendahl, A. Boisen, M. Kall, Detection of nerve gases using surface-enhanced Raman scattering substrates with high droplet adhesion, *Nanoscale* 8 (2016) 1305-1308.
- [3] F. Yan, T. Vo-Dinh, Surface-enhanced Raman scattering detection of chemical and biological agents using a portable Raman integrated tunable sensor, *Sensor. Actuat. B-Chem.* 121 (2007) 61-66.
- [4] S. Farquharson, A. Gift, P. Maksymiuk, F. Inscore, Surface-enhanced Raman spectra of VX and its hydrolysis products, *Appl. Spectrosc.* 59 (2005) 654-660.
- [5] A.K. Mahapatra, K. Maiti, S.K. Manna, R. Maji, S. Mondal, C. Das Mukhopadhyay, P. Sahoo, D. Mandal, A cyclization-induced emission enhancement (CIEE)-based ratiometric fluorogenic and chromogenic probe for the facile detection of a nerve agent simulant DCP, *Chem. Commun.* 51 (2015) 9729-9732.
- [6] I. Rodin, A. Stavrianidi, R. Smirnov, A. Braun, O. Shpigun, I. Rybalchenko, New Techniques for Nerve Agent Oxidation Products Determination in Environmental Water by High-Performance Liquid Chromatography-Mass Spectrometry (HPLC-MS) and Capillary Electrophoresis (CE) with Direct Ultraviolet (UV) Detection, *Environ. Forensics* 14 (2013) 87-96.
- [7] Y.C. Tsao, Y.C. Wang, S.F. Wu, W.H. Ding, Microwave-assisted headspace solid-phase microextraction for the rapid determination of organophosphate esters in aqueous samples by gas chromatography-mass spectrometry, *Talanta* 84 (2011) 406-410.
- [8] A. Menezes Filho, F.N. dos Santos, P.A. de Paula Pereira, Development, validation and application of a methodology based on solid-phase micro extraction

followed by gas chromatography coupled to mass spectrometry (SPME/GC-MS) for the determination of pesticide residues in mangoes, *Talanta* 81 (2010) 346-354.

[9] M. Maziejuk, M. Ceremuga, M. Szyposzynska, T. Sikora, A. Zalewska, Identification of organophosphate nerve agents by the DMS detector, *Sensor. Actuat. B-Chem.* 213 (2015) 368-374.

[10] W.E. Steiner, S.J. Klopsch, W.A. English, B.H. Clowers, H.H. Hill, Detection of a chemical warfare agent simulant in various aerosol matrixes by ion mobility time-of-flight mass spectrometry, *Anal. Chem.* 77 (2005) 4792-4799.

## 6. Calculated wavelength of 2D-PC

### 6.1 The 2D Bragg diffraction equation.

The diffraction process of 2D-PC was illustrated in figure S3, while white source (S1, S2) illuminated below the sample at an incidence angle of  $45^\circ$  ( $\theta$ ), and the structural color was recorded above the sample along the normal.

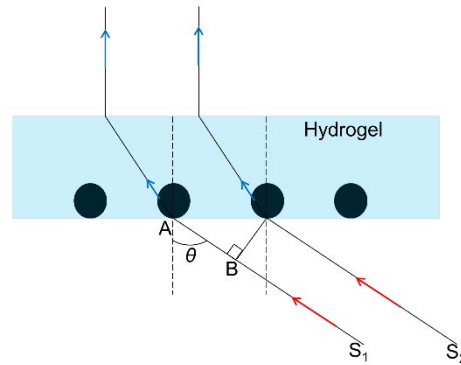

Figure S3 Illustration of the diffraction process of 2D-PC

The path difference  $\Delta$  was given by

$$\Delta = n_{air}(AB) = n_{air}(p \sin \theta) = p \sin \theta = \frac{\sqrt{3}}{2} d \sin \theta \quad (S2)$$

Where  $n_{air}$  is the refractive index of air ( $n_{air}=1$ ),  $p$  is the distance between adjacent lattice rows.  $\theta$  is the incidence angle. According to reference<sup>1</sup>,  $p$  is relate to the lattice spacing ( $d$ ) by

$$p = \frac{\sqrt{3}}{2} d \quad (S3)$$

According to Bragg's law, while the path difference ( $\Delta$ ) is equal to a whole number of wavelengths, the diffraction will be strengthened. So the path difference meets following equation:

$$\frac{\sqrt{3}}{2} d \sin \theta = m \lambda \quad (S4)$$

Where  $m$  is the diffraction order,  $\lambda$  is the diffracted wavelength. While the incidence angle was fixed, and we surmise the diffraction was the first-order diffraction. According to the determination of particle spacing, we can also calculate the diffracted wavelength of 2D-PC in different condition.

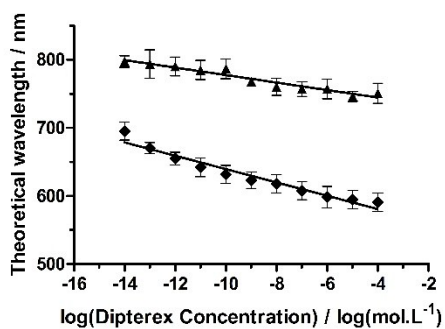

Figure S4 AChE-functionalized 2D-PC (◆) and unfunctionalized 2D-PC (▲) for dipterex detection.
